# Supplementary material for: Co-precipitation polymerization of dual functional monomers and polystyrene-co-divinylbenzene for ciprofloxacin imprinted polymer preparation
Source: Royal Society of Chemistry journal article supplement (doi:10.1039/d1ra05505d), 2021-01-01

## Electronic Supporting Information for

### **Co-precipitation polymerization of dual functional monomers and polystyrene- co-divinylbenzene for ciprofloxacin imprinted polymer preparation**

Huy Truong Nguyen,<sup>a</sup> Nhat Thao Vuong Bui,<sup>a</sup> Wilfried G. Kanhouannon,<sup>b</sup> Kim Long Vu Huynh,<sup>a</sup> Tran-Van-Anh Nguyen,<sup>a</sup> Hien Minh Nguyen,<sup>a</sup> Minh Huy Do,<sup>c</sup> Michael Badawi,<sup>d</sup> and Ut Dong Thach<sup>\*a</sup>

<sup>a</sup> Faculty of Pharmacy, Ton Duc Thang University, Ho Chi Minh City, Vietnam

<sup>b</sup> Laboratoire de Chimie Théorique et Spectroscopie Moléculaire (LACTHESMO), Université d'Abomey-Calavi, Bénin

<sup>c</sup> Faculty of Environmental and Food Engineering, Nguyen Tat Thanh University, Ho Chi Minh City, Vietnam

<sup>d</sup> Laboratoire de Physique et Chimie Théoriques UMR CNRS 7019, Université de Lorraine, France

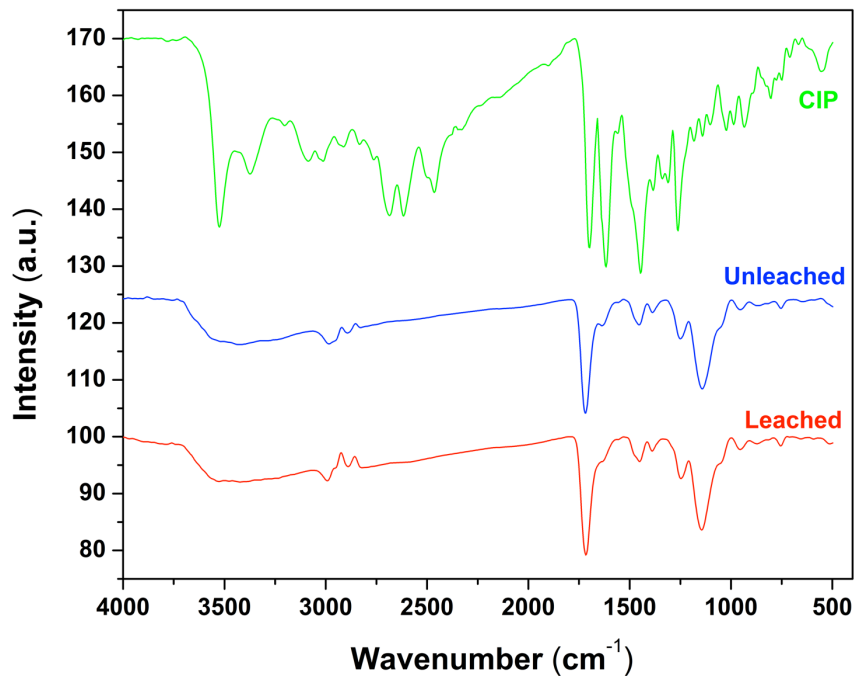

Figure S 1. FT-IR of ciprofloxacin (CIP), unleached and leached imprinted polymer

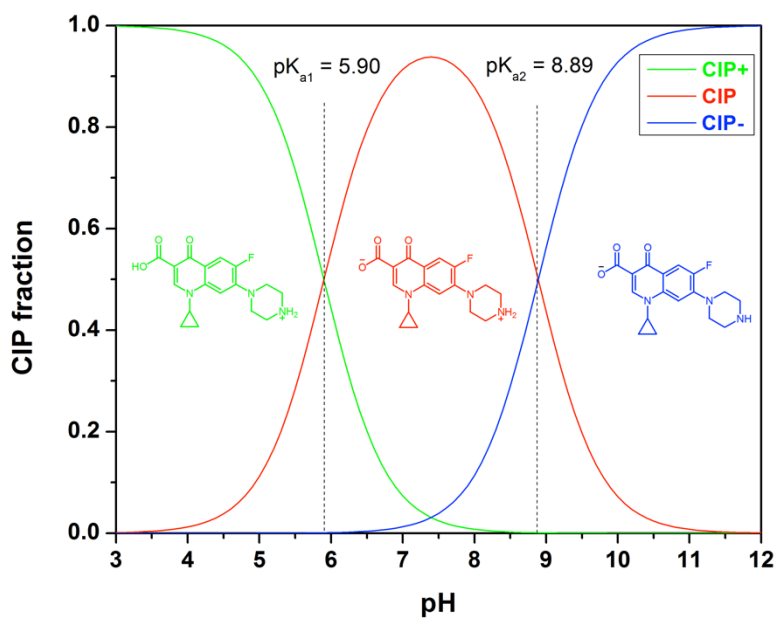

Figure S 2. Molecular structure of CIP and its ionic forms as a function of pH, calculated with  $pK_{a1} = 5.90$  and  $pK_{a2} = 8.89$

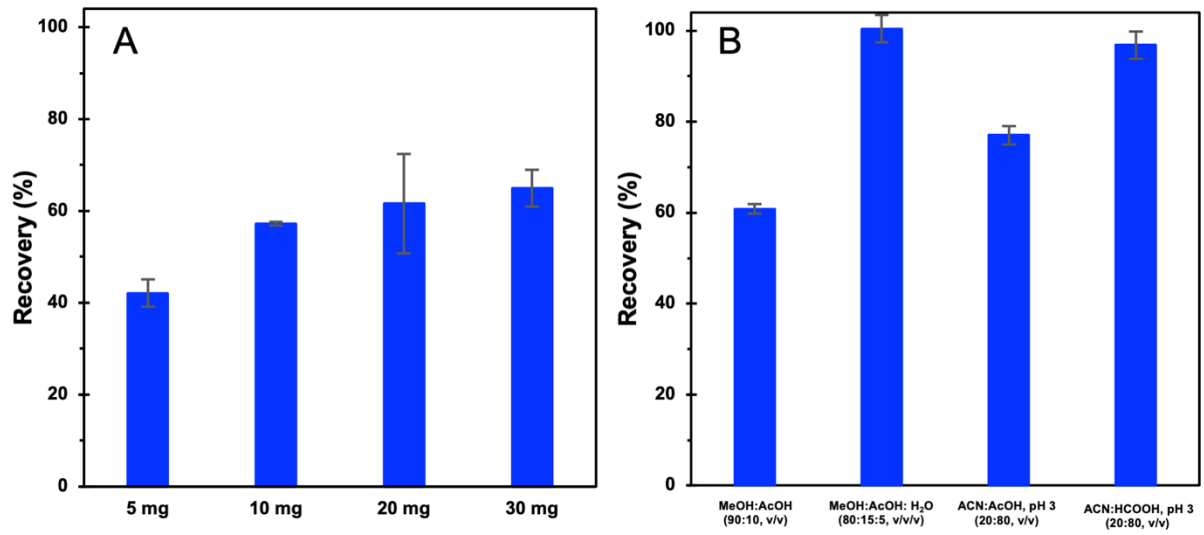

Figure S 3. Influence of mass of polymer (A) and elution solvent (B) on CIP extraction recovery

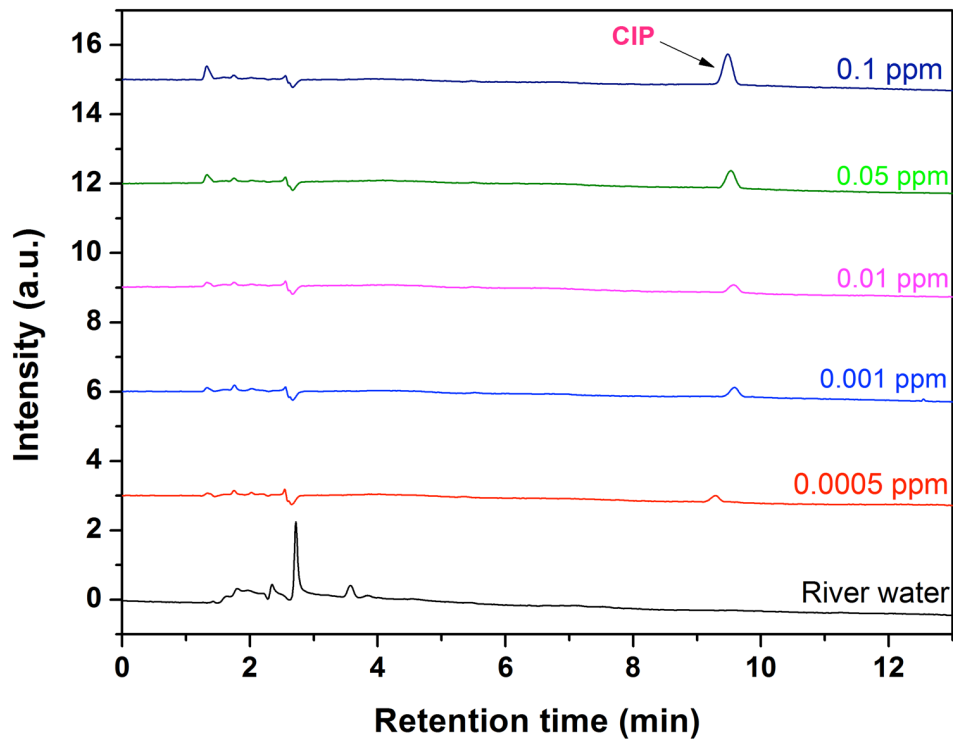

Figure S 4. Chromatograms of real river water samples and extraction of spiked samples at different concentrations

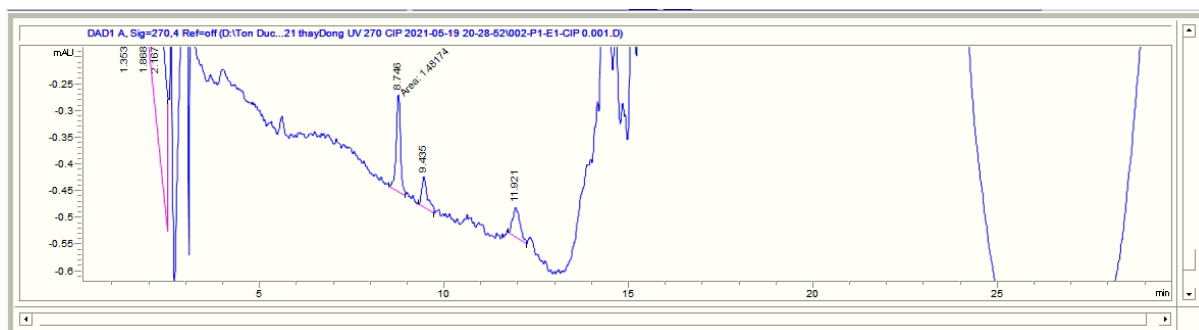

Noise determination:

| Time range            | Noise        | Noise        | Noise        | Wander | Drift     |
|-----------------------|--------------|--------------|--------------|--------|-----------|
| from [min]   to [min] | (6*SD) [mAU] | (PtoP) [mAU] | (ASTM) [mAU] | [mAU]  | [mAU/h]   |
| 6.000   7.000         | 2.395e-2     | 1.823e-2     | -            | -      | -5.853e-1 |
| 10.000   11.000       | 3.011e-2     | 2.143e-2     | -            | -      | -8.803e-1 |

| RetTime [min] | k' | Area [mAU*s] | Height [mAU] | Symm. | Width [min] | Plates | Resol | Signal /Noise |
|---------------|----|--------------|--------------|-------|-------------|--------|-------|---------------|
| 1.353         | -  | 5.03349e-1   | 1.26174e-1   | 1.06  | 0.0650      | 2393   | -     | 5.3           |
| 1.868         | -  | 2.66074      | 3.53756e-1   | 1.23  | 0.1316      | 1120   | 3.08  | 14.8          |
| 2.167         | -  | 14.13431     | 7.43272e-1   | 0.76  | 0.3396      | 225    | 0.74  | 31.0          |
| <u>8.746</u>  | -  | 1.48174      | 1.81036e-1   | 1.07  | 0.1167      | 31121  | 16.95 | <u>6.0</u>    |

Figure S 5. Reported chromatogram of 0.001 ppm CIP standrad solution

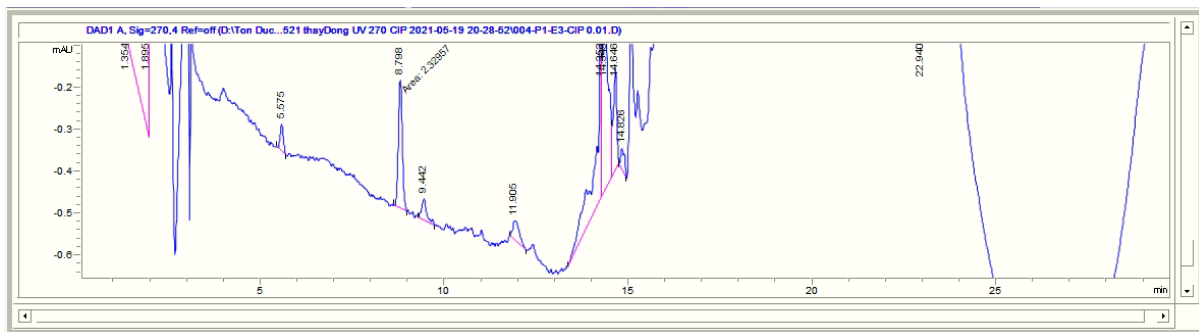

Noise determination:

| Time range            | Noise        | Noise        | Noise        | Wander | Drift   |
|-----------------------|--------------|--------------|--------------|--------|---------|
| from [min]   to [min] | (6*SD) [mAU] | (PtoP) [mAU] | (ASTM) [mAU] | [mAU]  | [mAU/h] |
| 6.000   7.000         | 2.205e-2     | 1.554e-2     | -            | -      | -1.121  |
| 10.000   11.000       | 3.208e-2     | 2.229e-2     | -            | -      | -1.056  |

| RetTime [min] | k' | Area [mAU*s] | Height [mAU] | Symm. | Width [min] | Plates | Resol | Signal /Noise |
|---------------|----|--------------|--------------|-------|-------------|--------|-------|---------------|
| 1.354         | -  | 2.22928      | 2.77190e-1   | 1.41  | 0.1033      | 950    | -     | 12.6          |
| 1.895         | -  | 10.65650     | 6.67580e-1   | 3.41  | 0.5418      | 68     | 0.99  | 30.3          |
| 5.575         | -  | 3.97873e-1   | 6.62914e-2   | 0.91  | 0.0944      | 19290  | 6.79  | 3.0           |
| <u>8.798</u>  | -  | 2.32957      | 3.07315e-1   | 0.92  | 0.1160      | 31880  | 18.00 | <u>9.6</u>    |

Figure S 6. Reported chromatogram of 0.01 ppm CIP standrad solution

Table S 1. Pseudo-first-order and pseudo-second-order parameters for CIP adsorption on polymers MIP4 and NIP4

| Polymer | Lagergren first-order           |                                |        | Pseudo second-order             |                                                 |        | Interparticle mass transfer diffusion              |        |
|---------|---------------------------------|--------------------------------|--------|---------------------------------|-------------------------------------------------|--------|----------------------------------------------------|--------|
|         | $q_e$<br>( $\text{mg g}^{-1}$ ) | $k_1$<br>( $\text{min}^{-1}$ ) | $R^2$  | $q_e$<br>( $\text{mg g}^{-1}$ ) | $k_2$<br>( $\text{mg g}^{-1} \text{min}^{-1}$ ) | $R^2$  | $k_{id}$<br>( $\text{mg g}^{-1} \text{min}^{-1}$ ) | $R^2$  |
| MIP4    | 5.1103                          | 0.0988                         | 0.9740 | 5.4371                          | 0.0361                                          | 0.9926 | 0.1425                                             | 0.9710 |
| NIP4    | 4.3379                          | 0.0629                         | 0.9312 | 4.8370                          | 0.0183                                          | 0.9391 | 0.2610                                             | 0.9344 |

Table S 2 : Interaction configurations of methacrylic acid (MAA) with CIP molecule

| Interaction energies $E_{int}$<br>(kJ/mol) | -72.12                                                                                                                                       | -36.24                                                                                                                                                                         | -19.30                                                                                                                                                                         |
|--------------------------------------------|----------------------------------------------------------------------------------------------------------------------------------------------|--------------------------------------------------------------------------------------------------------------------------------------------------------------------------------|--------------------------------------------------------------------------------------------------------------------------------------------------------------------------------|
| Configurations                             | <p>I- Double hydrogen bonds between carboxylic groups</p> 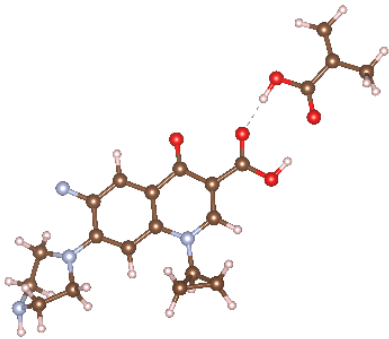 | <p>II- Hydrogen bond between H atom of MAA carboxylic group and carbonyl group of CIP</p>  | <p>III- Hydrogen bond between H atom of MAA carboxylic group and fluorine atom of CIP</p>  |

| -55.55                                                                                                                                                                                                                                                                                                                                                                                                                                                                                                                                                                         | -25.98                                                                                                                                                                                                                                                                                                                                                                                                                                                                                                                                                                   |
|--------------------------------------------------------------------------------------------------------------------------------------------------------------------------------------------------------------------------------------------------------------------------------------------------------------------------------------------------------------------------------------------------------------------------------------------------------------------------------------------------------------------------------------------------------------------------------|--------------------------------------------------------------------------------------------------------------------------------------------------------------------------------------------------------------------------------------------------------------------------------------------------------------------------------------------------------------------------------------------------------------------------------------------------------------------------------------------------------------------------------------------------------------------------|
| <p data-bbox="539 451 1012 635">IV- Hydrogen bond between H of MAA carboxylic group and one nitrogen atom of CIP</p> 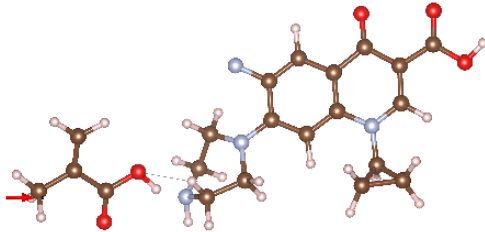 <p>The image shows a ball-and-stick model of a hydrogen bond. On the left, a carboxylic acid group (MAA) is shown with a red arrow pointing to a hydrogen atom. On the right, a nitrogen atom (CIP) is shown. A dashed line represents the hydrogen bond between the H and the N. The atoms are color-coded: carbon is brown, oxygen is red, and nitrogen is blue.</p> | <p data-bbox="1061 451 1525 560">V- flat interaction between MAA and CIP</p>  <p>The image shows a ball-and-stick model of a flat interaction. A carboxylic acid group (MAA) is shown on the left, and a nitrogen-containing ring (CIP) is shown on the right. The two molecules are oriented such that their planes are parallel to each other, indicating a pi-pi or similar flat interaction. The atoms are color-coded: carbon is brown, oxygen is red, and nitrogen is blue.</p> |



Table S 3 : Interaction configurations of 2-vinylpyridine (2-VP) with CIP molecule

| Interaction energies $E_{int}$<br>(kJ/mol) | -48.96                                                                                                                                                                  | -53.43                                                                                                                                               | -19.58                                                                                                                                                                          |
|--------------------------------------------|-------------------------------------------------------------------------------------------------------------------------------------------------------------------------|------------------------------------------------------------------------------------------------------------------------------------------------------|---------------------------------------------------------------------------------------------------------------------------------------------------------------------------------|
| Configurations                             | <p>I- Hydrogen bond between H atom of carboxylic group and nitrogen atom of 2-VP</p> 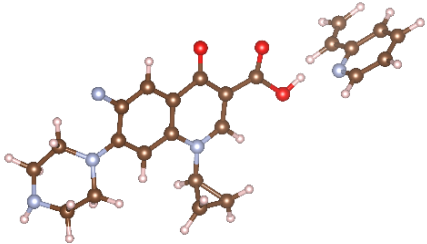 | <p>II- Pi-pi stacking between benzyl groups of CIP and 2-VP</p>  | <p>III- Hydrogen bond between H atom of ethylene group of 2-VP and oxygen atoms of CIP</p>  |

| -8.46                                                                                                                                                                                                      | -33.30                                                                                                                                                                                                      |
|------------------------------------------------------------------------------------------------------------------------------------------------------------------------------------------------------------|-------------------------------------------------------------------------------------------------------------------------------------------------------------------------------------------------------------|
| <p data-bbox="443 416 1048 600">IV- Hydrogen bond between H atom of ethylene group of 2-VP and nitrogen atom of CIP</p> 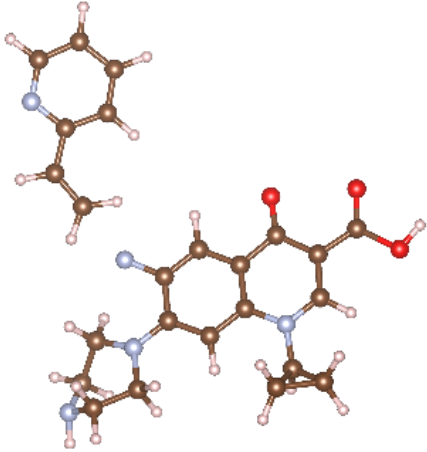 | <p data-bbox="1137 416 1697 600">V- Hydrogen bond between N atom of 2-VP and h atom bonded to nitrogen atom in CIP</p>  |

Table S 4 : Monomer-monomer interactions

| Interaction energies<br>$E_{int}$ (kJ/mol) | <b>-50.88</b>                                                                                                                                               | -6.00                                                                                                                                                                            | -17.30                                                                                                                               |
|--------------------------------------------|-------------------------------------------------------------------------------------------------------------------------------------------------------------|----------------------------------------------------------------------------------------------------------------------------------------------------------------------------------|--------------------------------------------------------------------------------------------------------------------------------------|
| Configurations                             | <p>I- H bond between 2VP nitrogen atom and H of MAA carboxylic group</p> 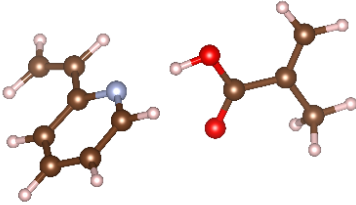 | <p>II- H bond between H atom of ethylene of 2VP atom and O atom of MAA carboxylic group</p>  | <p>III- Flat interaction between MAA and 2VP</p>  |

Table S 5 : Monomers arrangement in MIP and NIP polymers

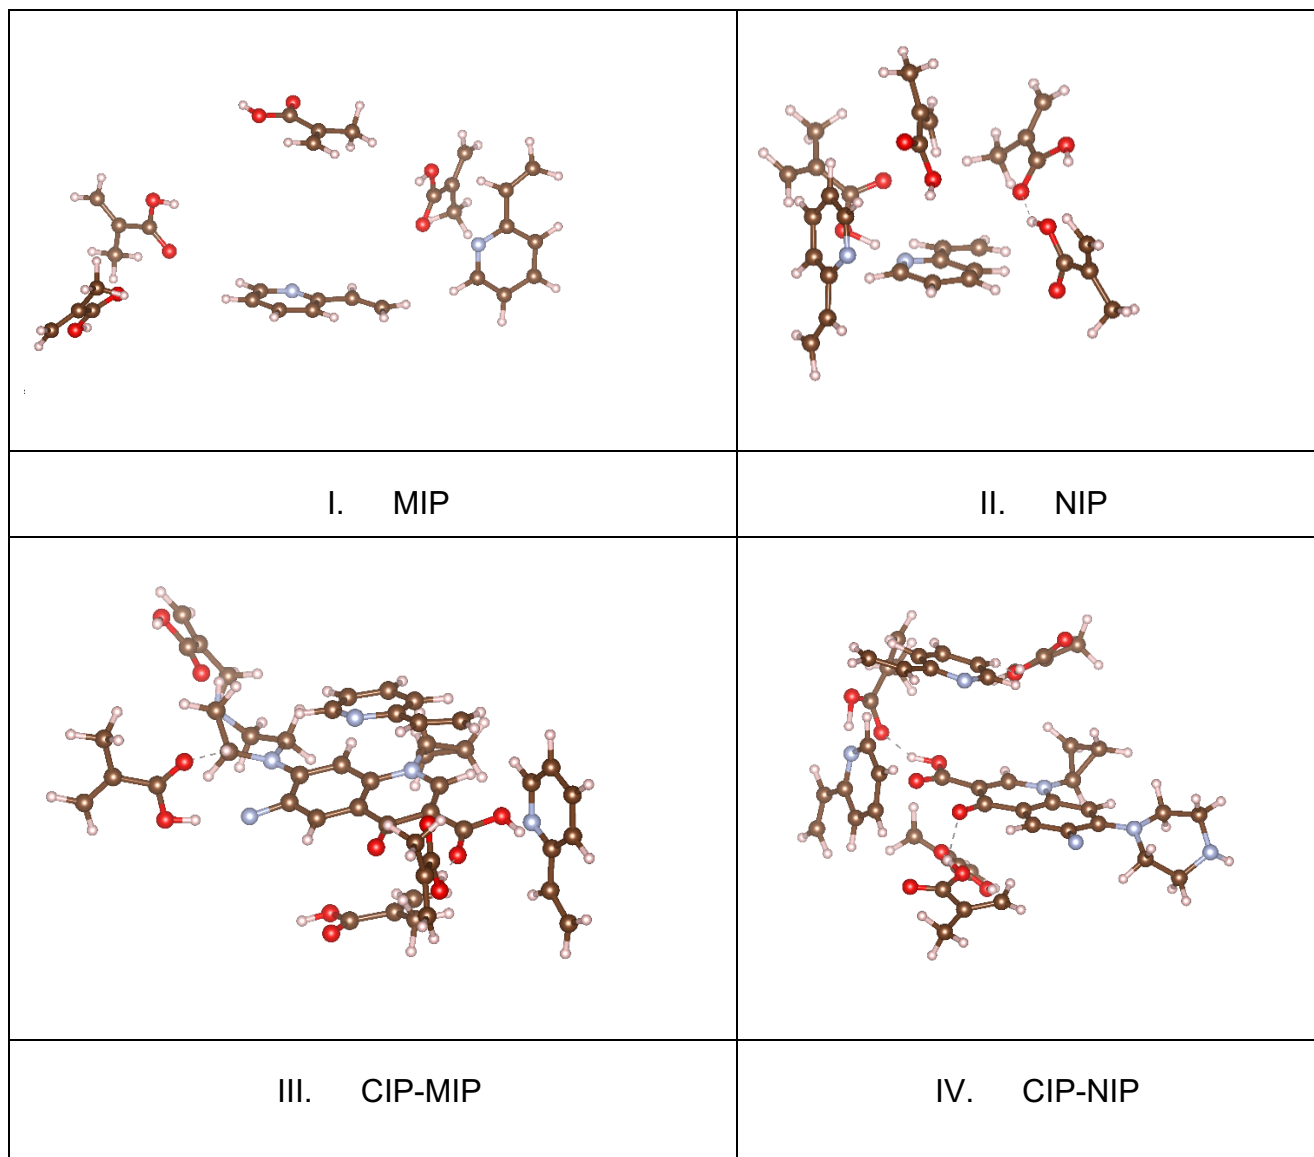

Supplement: d1ra05505d1.pdf [file d1ra05505d1.pdf]
